# Supplementary material
Source: PubMed Central journal article supplement (PMC2805727)
Supplement: 2009.011221_1.pdf [file 2009.011221_1.pdf]

# Concurrent intensive chemotherapy and imatinib before and after stem cell transplantation in newly diagnosed Philadelphia chromosome-positive acute lymphoblastic leukemia. Final results of the CSTIBES02 trial

Josep-Maria Ribera,<sup>1</sup> Albert Oriol,<sup>1</sup> Marcos González,<sup>2</sup> Belén Vidriales,<sup>2</sup> Salut Brunet,<sup>3</sup> Jordi Esteve,<sup>4</sup> Eloy del Potro,<sup>4</sup> Concepción Rivas,<sup>6</sup> Maria-José Moreno,<sup>7</sup> Mar Tormo,<sup>8</sup> Victoria Martín-Reina,<sup>9</sup> Josep Sarrá,<sup>10</sup> Ricardo Parody,<sup>11</sup> Jaime Pérez de Oteyza,<sup>12</sup> Encarna Bureo,<sup>13</sup> and Maria-Teresa Bernal<sup>1</sup> on behalf of the Programa Español de Tratamiento en Hematología (PETHEMA) and Grupo Español de Trasplante Hemopoyético (GETH) Groups

<sup>1</sup>Departments of Hematology of the Hospitals Institut Català d'Oncologia-Hospital Germans Trias i Pujol, Badalona; <sup>2</sup>Clínico, Salamanca; <sup>3</sup>Sant Pau, Barcelona; <sup>4</sup>Clínico, Barcelona; <sup>5</sup>Clínico San Carlos, Madrid; <sup>6</sup>Universitario, Alicante; <sup>7</sup>Clínico Virgen de la Victoria, Málaga; <sup>8</sup>Clínico, Valencia; <sup>9</sup>Puerta del Mar, Cádiz; <sup>10</sup>Duran y Reynals, Barcelona; <sup>11</sup>Virgen del Rocío, Sevilla; <sup>12</sup>Ramón y Cajal, Madrid; <sup>13</sup>Marqués de Valdecilla, Santander and Central de Asturias (EMR), Spain

*itation: Ribera J-M, Oriol A, González M, Vidriales B, Brunet S, Esteve J, del Potro E, Rivas, Moreno M-J, Tormo M, Martín-Reina V, Sarrá J, Parody R, Pérez de Oteyza J, Bureo E, and Bernal M-T on behalf of the Programa Español de Tratamiento en Hematología (PETHEMA) and Grupo Español de Trasplante Hemopoyético (GETH) Groups. Concurrent intensive chemotherapy and imatinib before and after stem cell transplantation in newly diagnosed Philadelphia chromosome-positive acute lymphoblastic leukemia. Final results of the CSTIBES02 trial. Haematologica 2009; doi:10.3324/haematol.2009.011221*

©2010 Ferrata Storti Foundation. This is an open-access paper.

A

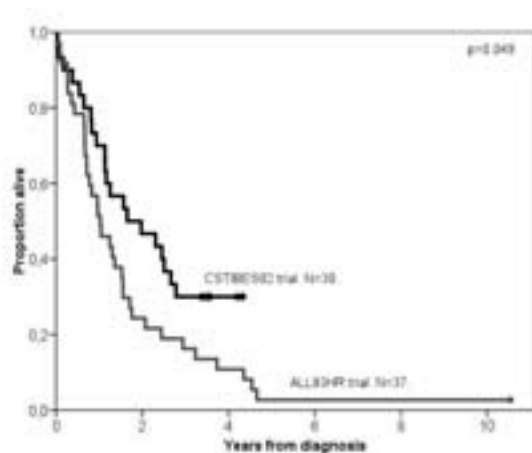

B

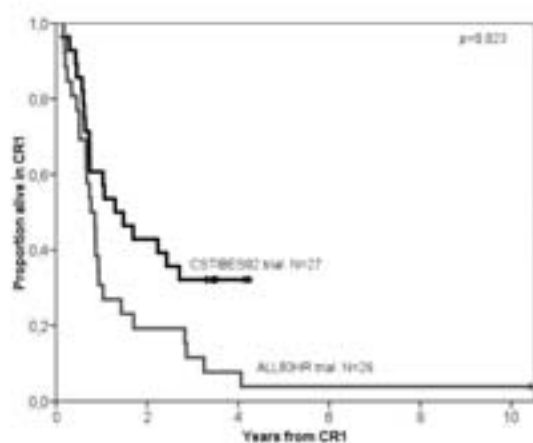

Online Supplementary Figure 1. Comparison of the probabilities of over- all survival (a) and disease-free survival (B) of the patients included in the CSTIBES02 trial versus those from the historical trial ALL93.
